# Supplementary material for: Development of NHAcGD2/NHAcGD3 conjugates of bacteriophage MX1 virus-like particles as anticancer vaccines
Source: Royal Society of Chemistry journal article supplement (doi:10.1039/d3ra08923a), 2024-01-01
Supplement: d3ra08923a1.pdf [file d3ra08923a1.pdf]

3.86 – 3.50 (m, 19H), 3.46 (dd,  $J = 9.2, 1.9$  Hz, 1H), 3.36 – 3.25 (m, 2H), 3.15 (t,  $J = 7.2$  Hz, 2H), 2.76 (dd,  $J = 12.4, 4.6$  Hz, 1H), 2.66 (dd,  $J = 12.3, 4.4$  Hz, 1H), 2.04 (s, 3H), 2.02 (s, 3H), 2.01 (s, 3H), 1.73 (td,  $J = 12.2, 6.4$  Hz, 2H);  $^{13}\text{C}$  NMR (150 MHz,  $\text{D}_2\text{O}$ )  $\delta$  174.85, 174.46, 173.27, 173.23, 102.64, 102.04, 100.51, 98.00, 78.08, 77.91, 75.40, 75.17, 74.72, 74.14, 74.00, 72.69, 72.40, 69.75, 69.56, 69.18, 69.09, 68.37, 67.82, 67.79, 67.45, 65.85, 61.42, 61.01, 59.81, 52.16, 51.61, 42.19, 40.38, 39.49, 37.51, 26.58, 22.19, 21.93, 21.73. HRMS (ESI)  $m/z$  calcd for  $\text{C}_{39}\text{H}_{65}\text{N}_4\text{O}_{27}$   $[\text{M}-\text{H}]^-$  1021.3842, found 1021.3723.

### NHAcGD3-NCS **8**

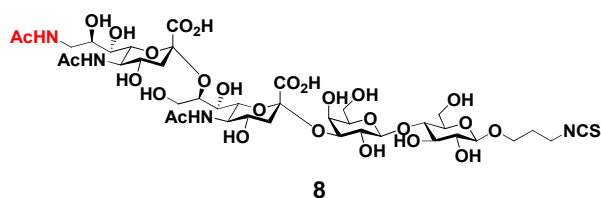

**S10** (15 mg, 0.015 mmol) was dissolved in an aqueous  $\text{NaHCO}_3$  solution (500  $\mu\text{L}$ , 10 mg/mL). To the solution was added chloroform (750  $\mu\text{L}$ ) containing thiophosgene (1.67  $\mu\text{L}$ , 21.8  $\mu\text{mol}$ ). The reaction solution was stirred at RT for 3 h. The reaction mixture was then diluted with water. The aqueous layer was extracted twice with chloroform and freeze-dried to give NHAcGD3-NCS **8**.  $^1\text{H}$  NMR (600 MHz,  $\text{D}_2\text{O}$ )  $\delta$  4.31 – 4.20 (m, 2H), 3.96 – 3.82 (m, 3H), 3.81 – 3.21 (m, 27H), 3.16 – 2.99 (m, 2H), 2.51 (dd,  $J = 12.5, 4.5$  Hz, 1H), 2.41 (dd,  $J = 12.3, 4.3$  Hz, 1H), 1.80 (d,  $J = 1.6$  Hz, 3H), 1.78 (s, 3H), 1.77 (s, 3H), 1.49 (q,  $J = 11.7$  Hz, 2H). HRMS (ESI)  $m/z$  calcd for  $\text{C}_{40}\text{H}_{63}\text{N}_4\text{O}_{27}\text{S}$   $[\text{M}-\text{H}]^-$  1063.3406, found 1063.3273.

### GD3-NH<sub>2</sub> **S11**

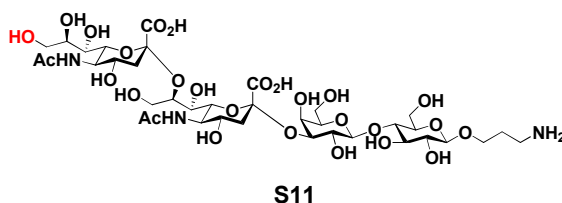

**S7** (20 mg, 0.02 mmol) was dissolved in  $\text{H}_2\text{O}/\text{MeOH}$  (2 mL, 1:1 v/v). To this solution was added Pd/C (10 wt.% loading, 10 mg). The atmosphere was removed by vacuum and replaced by  $\text{H}_2$ , and the reaction solution was stirred under  $\text{H}_2$  for 12 h.
