# Supplementary material for: Development of NHAcGD2/NHAcGD3 conjugates of bacteriophage MX1 virus-like particles as anticancer vaccines
Source: Royal Society of Chemistry journal article supplement (doi:10.1039/d3ra08923a), 2024-01-01
Supplement: d3ra08923a2.pdf [file d3ra08923a2.pdf]

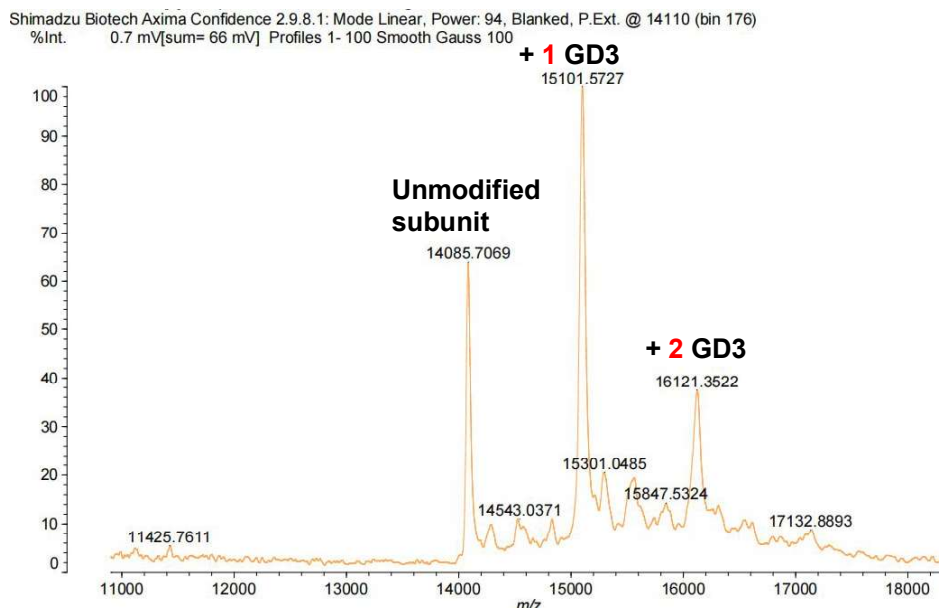

**Fig. S11** MALDI-TOF MS for MX1-GD3 conjugate **10**. MS analysis of **MX1-NHAcGD3** conjugate **10** showed an average of 180 copies of GD3 on each MX1 particle.

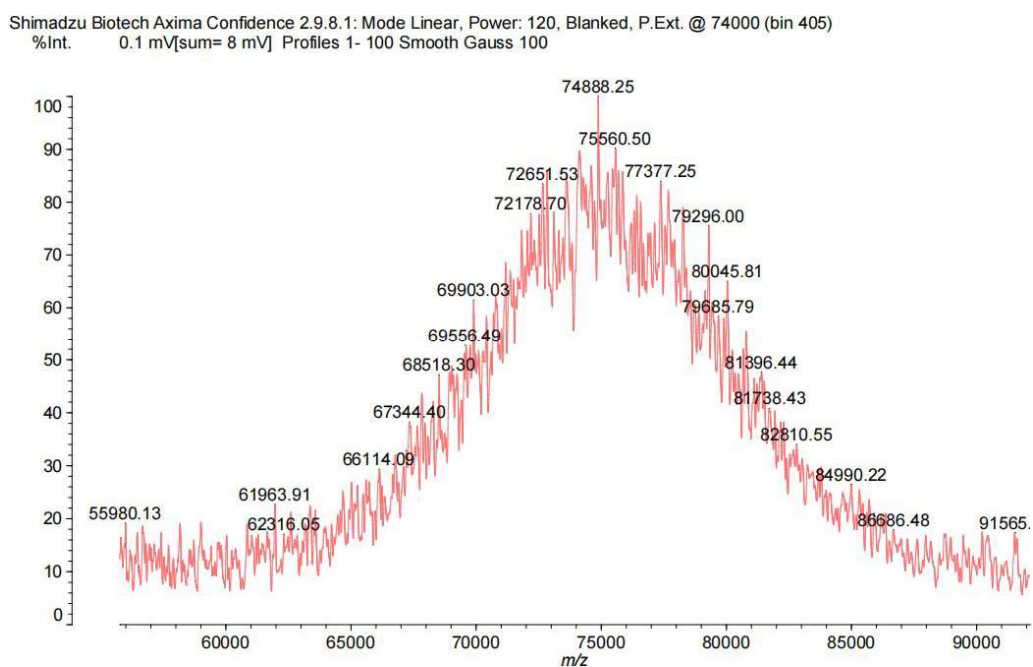

**Fig. S12** MALDI-TOF MS characterization of BSA-NHAcGD3 conjugate **12** for ELISA. MS analysis of the conjugate **12** showed that the number of NHAcGD3 per BSA was 8 on average.
